# Supplementary material for: Olive Leaf Processing for Infusion Purposes
Source: MDPI journal article supplement (doi:10.3390/foods12030591), 2023-01-30
Supplement: s1 [file s1]

**Table S1.** The coefficient values of the Page model for the drying of olive leaves.

| Drying equipment | Temperature (T) °C | Drying co-efficient ( <i>k</i> ) s <sup>-1</sup> | Coefficient ( <i>a</i> ) | Coefficient of determination ( <i>R</i> <sup>2</sup> ) |
|------------------|--------------------|--------------------------------------------------|--------------------------|--------------------------------------------------------|
| Oven             | 40                 | 59.40                                            | 0.21                     | 0.99                                                   |
|                  | 50                 | 469.44                                           | 0.61                     | 0.99                                                   |
|                  | 60                 | 969.12                                           | 0.61                     | 0.99                                                   |
|                  | 70                 | 8584.56                                          | 0.51                     | 0.99                                                   |
| Infrared         | 40                 | 297.00                                           | 0.45                     | 0.98                                                   |
|                  | 50                 | 1813.68                                          | 0.62                     | 0.99                                                   |
|                  | 60                 | 16340.04                                         | 0.75                     | 0.98                                                   |
|                  | 70                 | 71269.20                                         | 0.34                     | 0.99                                                   |
